# Supplementary material for: Development of Efficient One-Pot Methods for the Synthesis of Luminescent Dyes and Sol–Gel Hybrid Materials
Source: MDPI journal article supplement (doi:10.3390/ma15010203), 2021-12-28
Supplement: s1 [file s1]

# Development of Efficient One-Pot Methods for the Synthesis of Luminescent Dyes and Sol–Gel Hybrid Materials

Maria Zdończyk <sup>1,2</sup>, Bartłomiej Potaniec <sup>2</sup>, Marcin Skoreński <sup>2</sup> and Joanna Cybińska <sup>1,2,\*</sup>

<sup>1</sup> Faculty of Chemistry, University of Wrocław, F. Joliot-Curie 14 Street, 50-383 Wrocław, Poland; maria.zdonczyk@chem.uni.wroc.pl (M.Z.)

<sup>2</sup> Advanced Materials Synthesis Group, Łukasiewicz Research Network – PORT Polish Center for Technology, Stabłowicka 147 Street, 54-066 Wrocław, Poland; bartlomiej.potaniec@port.lukasiewicz.gov.pl (B.P.); marcin.skorenski@port.lukasiewicz.gov.pl (M.S.)

\* Correspondence: joanna.cybinska@chem.uni.wroc.pl or joanna.cybinska@port.lukasiewicz.gov.pl

## S1. General Characterization of Obtained Derivatives

### 3',6'-Dimethoxy-3H-spiro[isobenzofuran-1,9'-xanthen]-3-one (1- product A)

<sup>1</sup>H NMR (500 MHz, DMSO-*d*<sub>6</sub>) δ 8.03 (dd, *J* = 7.6, 0.8 Hz, 1H), 7.80 (td, *J* = 7.5, 1.1 Hz, 1H), 7.74 (td, *J* = 7.5, 0.9 Hz, 1H), 7.28 (d, *J* = 7.6 Hz, 1H), 6.93 (d, *J* = 2.5 Hz, 2H), 6.75 (d, *J* = 2.5 Hz, 1H), 6.73 (d, *J* = 2.5 Hz, 1H), 6.71 – 6.67 (m, 2H), 3.83 (s, 6H); FTIR-ATR [cm<sup>-1</sup>]: 3052.78, 3006.32, 2917.19, 2832.99, 1761.4, 1632.01, 1613.42, 1576.22, 1502.01, 1464.45, 1435.28, 1421.05, 1350.67, 1283.07, 1247.29, 1207.56, 1170.46, 1161.16, 1108.89, 1097.53, 1079.93, 1029.26, 988.75, 956.93, 879.93, 827.79, 794.20, 766.36, 735.27, 694.57, 669.95, 650.68, 621.11, 610.39, 587.82, 531.67, 485.02, 466.31, 450.96, 433.85; LC-MS: *t*<sub>R</sub> = 20.1 min; MS: calcd for (C<sub>22</sub>H<sub>16</sub>O<sub>5</sub>)H<sup>+</sup>, 361.1; found 361.2.

### Methyl 2-(3-hydroxy-6-methoxy-3H-xanthen-9-yl)benzoate (1- product B)

<sup>1</sup>H NMR (500 MHz, DMSO-*d*<sub>6</sub>) δ 8.22 (dd, *J* = 7.9, 1.0 Hz, 1H), 7.88 (td, *J* = 7.5, 1.3 Hz, 1H), 7.79 (td, *J* = 7.7, 1.3 Hz, 1H), 7.50 (dd, *J* = 7.6, 0.9 Hz, 1H), 7.23 (d, *J* = 2.4 Hz, 1H), 6.90 (dd, *J* = 8.9, 2.4 Hz, 1H), 6.85 (d, *J* = 8.9 Hz, 1H), 6.81 (d, *J* = 9.7 Hz, 1H), 6.39 (dd, *J* = 9.7, 1.9 Hz, 1H), 6.25 (d, *J* = 1.9 Hz, 1H), 3.92 (s, 3H), 3.59 (s, 3H); FTIR-ATR [cm<sup>-1</sup>]: 3606.27, 3377.38, 3001.61, 2947.29, 2846.54, 1724.52, 1642.90, 1586.78, 1541.09, 1506.36, 1479.35, 1452.11, 1414.65, 1378.30, 1345.79, 1272.68, 1255.33, 1210.40, 1139.10, 1104.42, 1078.05, 1023.73, 965.51, 932.15, 917.79, 898.05, 851.57, 822.70, 797.45, 750.58, 714.61, 705.43, 662.69, 624.53, 600.52, 589.69, 569.21, 527.04, 486.80, 443.18; LC-MS: *t*<sub>R</sub> = 15.2 min; MS: calcd for (C<sub>22</sub>H<sub>16</sub>O<sub>5</sub>)H<sup>+</sup>, 361.1; found 361.2.

### 3',6'-diethoxy-3H-spiro[isobenzofuran-1,9'-xanthen]-3-one (2- product A)

<sup>1</sup>H NMR (500 MHz, DMSO-*d*<sub>6</sub>) δ 8.01 (dd, *J* = 7.6, 0.9 Hz, 1H), 7.79 (td, *J* = 7.5, 1.1 Hz, 1H), 7.73 (td, *J* = 7.5, 0.9 Hz, 1H), 7.27 (d, *J* = 7.6 Hz, 1H), 6.89 (d, *J* = 2.4 Hz, 1H), 6.72 (d, *J* = 2.5 Hz, 1H), 6.70 (d, *J* = 2.5 Hz, 1H), 6.67 (s, 1H), 6.65 (s, 1H), 4.09 (q, *J* = 7.0 Hz, 4H), 1.33 (t, *J* = 7.0 Hz, 6H); FTIR-ATR [cm<sup>-1</sup>]: 2982.10, 2921.70, 2850.78, 1747.76, 1616.12, 1600.13, 1569.11, 1504.73, 1464.19, 1427.74, 1394.12, 1355.10, 1327.18, 1284.81, 1272.40, 1247.93, 1224.11, 1191.66, 1163.46, 1104.66, 1082.97, 1042.68, 1012.13, 1001.14, 968.66, 950.32, 936.92, 898.03, 869.42, 837.70, 824.76, 816.17, 785.34, 759.29, 694.81, 671.40, 650.87, 638.69, 616.63, 583.63, 521.28, 510.87, 463.72, 450.28, 417.92; LC-MS: *t*<sub>R</sub> = 15.2 min; MS: calcd for (C<sub>24</sub>H<sub>20</sub>O<sub>5</sub>)H<sup>+</sup>, 389.1; found 389.3.

### ethyl 2-(6-ethoxy-3-oxo-3H-xanthen-9-yl)benzoate (2- product B)

<sup>1</sup>H NMR (500 MHz, DMSO-*d*<sub>6</sub>) δ 8.19 (dd, *J* = 7.9, 1.1 Hz, 1H), 7.86 (td, *J* = 7.5, 1.3 Hz, 1H), 7.78 (td, *J* = 7.7, 1.3 Hz, 1H), 7.50 (dd, *J* = 7.6, 1.0 Hz, 1H), 7.20 (d, *J* = 2.3 Hz, 1H), 6.91 – 6.79 (m, 3H), 6.39 (dd, *J* = 9.7, 1.9 Hz, 1H), 6.23 (d, *J* = 1.9 Hz, 1H), 4.19 (q, *J* = 7.0 Hz, 2H), 4.02 – 3.89 (m, 2H), 1.36 (t, *J* = 7.0 Hz, 3H), 0.86 (t, *J* = 7.1 Hz, 3H); FTIR-ATR [cm<sup>-1</sup>]: 3388.66, 3059.18, 2981.42, 2938.35, 1718.91, 1643.24, 1588.98, 1540.65, 1504.77, 1468.38, 1452.27,

1413.96, 1400.70, 1377.56, 1344.98, 1253.23, 1208.74, 1167.41, 1139.58, 1103.50, 1079.44, 1041.33, 986.00, 959.98, 921.84, 878.96, 851.75, 822.41, 754.96, 709.74, 661.08, 621.69, 612.16, 589.79, 570.59, 495.40, 462.55, 439.86, 416.44; **LC-MS**:  $t_R$  = 21.1 min; **MS**: calcd for  $(C_{24}H_{20}O_5)H^+$ , 389.1; found 389.3.

## S2. Spectroscopic Properties

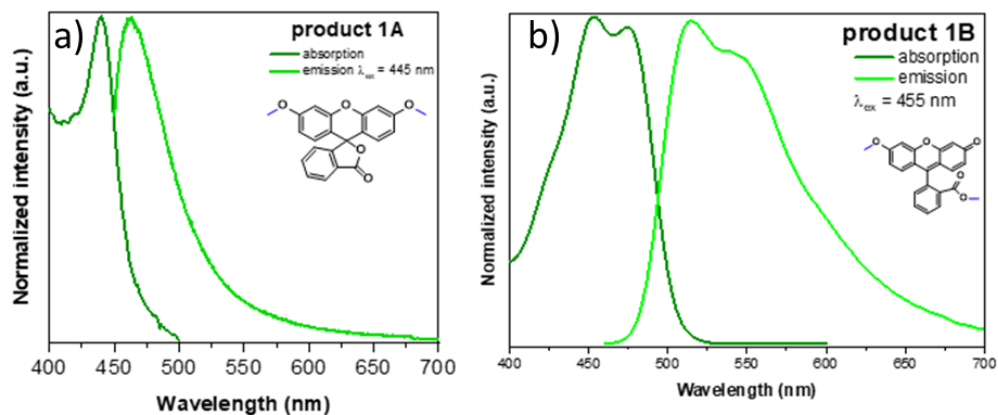

**Figure S2.1.** Emission and absorption spectra measured for: (a) product 1A in DCM; (b) product 1B in 0.1M NaOH.

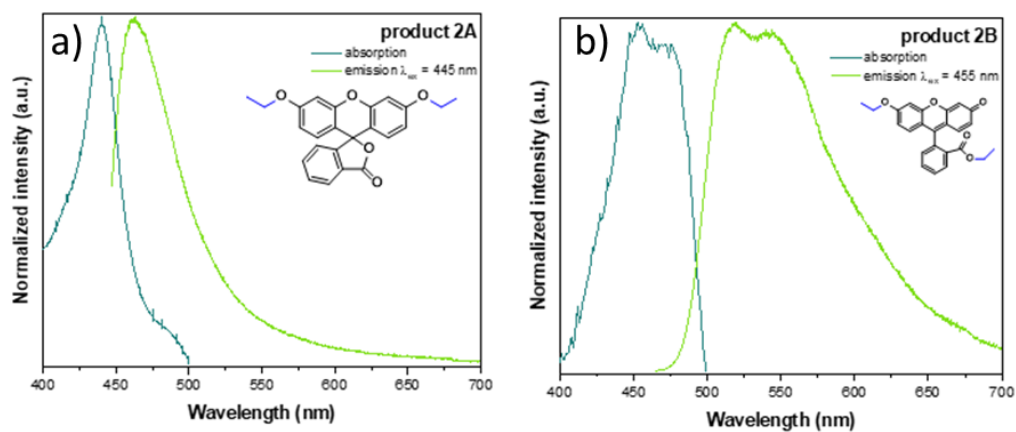

**Figure S2. 2.** Emission and absorption spectra measured: (a) product 2A in DCM; (b) product 2B in 0.1M NaOH.

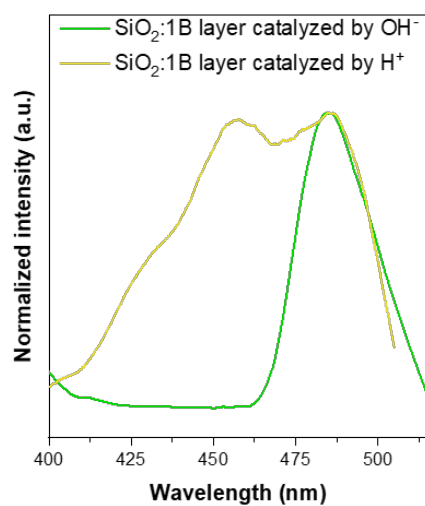

Figure S2.3. Gels' absorption spectra.

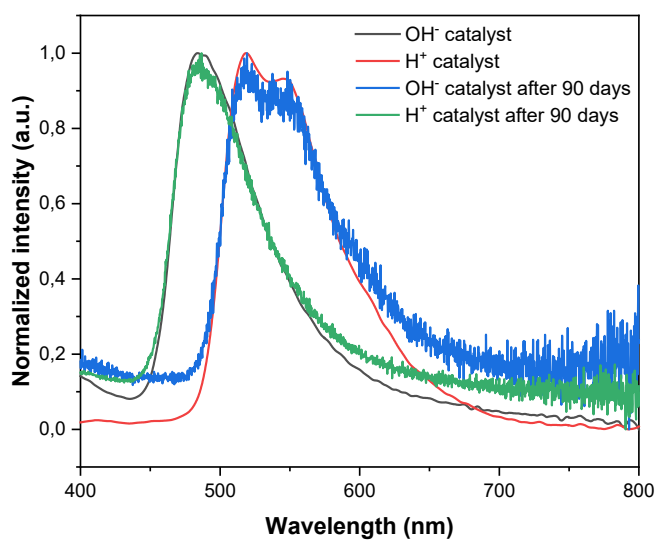

Figure S2.4. Gels' emission spectra measured in comparison after 90 days.

Table S2.1. Deconvolution table for SiO<sub>2</sub> gel-layers doped with derivative 1B catalyzed by H<sup>+</sup>.

| Model           | Gauss                                                                                                            |                        |
|-----------------|------------------------------------------------------------------------------------------------------------------|------------------------|
| Equation        | $y = y_0 + \frac{A}{\left(w \times \sqrt{\frac{\pi}{2}}\right) \times e^{\left(\frac{-2(x-x_c)^2}{w^2}\right)}}$ |                        |
| Plot            | Peak 1                                                                                                           | Peak 2                 |
| y <sub>0</sub>  | 0.09908 ± 0.00124                                                                                                | 0.09908 ± 0.00124      |
| x <sub>c</sub>  | 486.41472 ± 0.15742 nm                                                                                           | 525.15791 ± 1.30576 nm |
| w               | 36.29697 ± 0.58509 nm                                                                                            | 76.07913 ± 1.35126 nm  |
| FWHM            | 1866 cm <sup>-1</sup>                                                                                            | 2761 cm <sup>-1</sup>  |
| A               | 29.75164 ± 1.15786                                                                                               | 40.41715 ± 1.35372     |
| Reduced Chi-Sqr | 0.00109                                                                                                          |                        |
| R-Square (COD)  | 0.98492                                                                                                          |                        |
| Adj. R-Square   | 0.98486                                                                                                          |                        |

**Table S2. 2.** Deconvolution table for SiO<sub>2</sub> gel-layers doped with derivative 1B catalyzed by OH<sup>-</sup>.

| Model           | Gauss                                                                                                            |                                    |                                    |
|-----------------|------------------------------------------------------------------------------------------------------------------|------------------------------------|------------------------------------|
| Equation        | $y = y_0 + \frac{A}{\left(w \times \sqrt{\frac{\pi}{2}}\right) \times e^{\left(\frac{-2(x-x_c)^2}{w}\right)^2}}$ |                                    |                                    |
| Plot            | Peak 1                                                                                                           | Peak 2                             | Peak 3                             |
| y <sub>0</sub>  | 0.03505 ± 3.22203·10 <sup>-4</sup>                                                                               | 0.03505 ± 3.22203 10 <sup>-4</sup> | 0.03505 ± 3.22203·10 <sup>-4</sup> |
| x <sub>c</sub>  | 512.23321 ± 0.04897                                                                                              | 542.4366 ± 0.21751                 | 583.25472 ± 0.75272                |
|                 | nm                                                                                                               | nm                                 | nm                                 |
| w               | 22.74157 ± 0.15506                                                                                               | 46.44193 ± 0.50766                 | 87.30921 ± 0.59525                 |
|                 | nm                                                                                                               | nm                                 | nm                                 |
| FWHM            | 880 cm <sup>-1</sup>                                                                                             | 1980 cm <sup>-1</sup>              | 2853 cm <sup>-1</sup>              |
| A               | 15.12764 ± 0.29947                                                                                               | 37.07062 ± 0.86908                 | 38.11507 ± 0.69258                 |
| Reduced Chi-Sqr | 5.43755·10 <sup>-5</sup>                                                                                         |                                    |                                    |
| R-Square (COD)  | 0.99945                                                                                                          |                                    |                                    |
| Adj. R-Square   | 0.99945                                                                                                          |                                    |                                    |
